# Supplementary material
Source: PubMed Central journal article supplement (PMC4297551)

**Figure S2: PACT Center-2 Flow analysis.**

Product 2A was analyzed by flow cytometry for expression of cellular markers for mesenchymal stromal cell phenotype. The RSP5 reference standard was included in this analysis to monitor and control for assay-to-assay variability. The percentage of cell surface marker expression was low to undetectable for CD14, CD19, CD34, CD45, and HLA-DR (MHC Class II) and >95% for CD73, CD90, CD105, and HLA-ABC (MHC Class I).

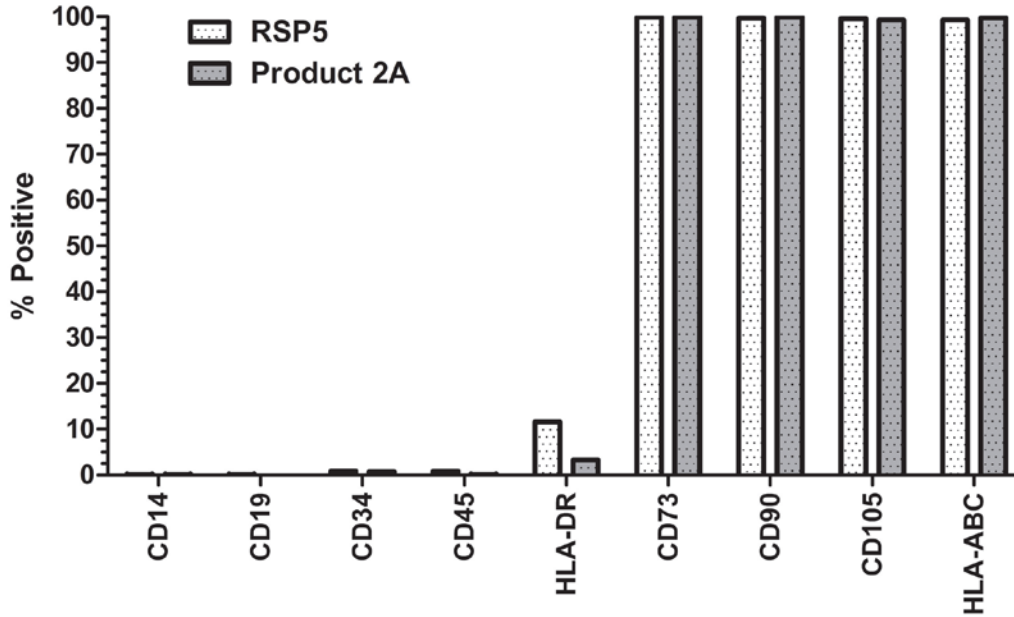

Supplement: NIHMS634648-supplement-2.pdf [file NIHMS634648-supplement-2.pdf]
